# Supplementary material
Source: publisher site journal article supplement (https://www.dovepress.com/article/562058)
Supplement: Supplementary file 1 [file Supplementary%20Data.docx]

**Supplementary Data:**

**Supplementary file 1**

**Pre/Post workforce survey**

1. **What is your knowledge of the Victorian Allied Health Assistant Workforce Project recommendations and resources?**

1 (no knowledge), 10 (knowledge of all recommendations)

**N/A 1 2**  **3 4**  **5**  **6 7 8 9 10**
**_______________________________________________________________________________________**

1. **Please rate your workplace’s current practice in alignment with each of the following groups of Victorian Allied Health Assistant Workforce Project recommendations:**

1(not at all), 10 (completely)

1. Pre-employment training (Recommendations 1-5)

**N/A 1 2**  **3 4**  **5**  **6 7 8 9 10**
**_______________________________________________________________________________________**

1. Workforce planning and governance to prepare the workplace for an Allied health assistant (Recommendations 6-9)

**N/A 1 2**  **3 4**  **5**  **6 7 8 9 10**
**_______________________________________________________________________________________**

1. Consumer centered therapy and supports for Allied Health services (Recommendation 10)

**N/A 1 2**  **3 4**  **5**  **6 7 8 9 10**
**_______________________________________________________________________________________**

1. Recruitment (Recommendation 11 and 12)

**N/A 1 2**  **3 4**  **5**  **6 7 8 9 10**
**_______________________________________________________________________________________**

1. Orientation and induction for Allied health assistants and Allied health professionals (Recommendation 13)

**N/A 1 2**  **3 4**  **5**  **6 7 8 9 10**
**_______________________________________________________________________________________**

1. Workplace competency-based training for Allied health assistants (Recommendation 14-17)

**N/A 1 2**  **3 4**  **5**  **6 7 8 9 10**
**_______________________________________________________________________________________**

1. Targeting Professional Development for Allied health assistants (Recommendation 18)

**N/A 1 2**  **3 4**  **5**  **6 7 8 9 10**
**_______________________________________________________________________________________**

1. **Indicate your workplace’s capacity to align to the Victorian Allied Health Assistant Workforce Project recommendations? (ie, resource capacity, Allied Health workforce capability, service need, previous adoption of evidenced based change)**

1 (no capacity), 10 (full capacity)

**N/A 1 2**  **3 4**  **5**  **6 7 8 9 10**
**________________________________________________________________________________________**

1. **Have you used/trialled the Victorian Allied Health Assistant Workforce Project implementation resources in your setting?**

**Y/N**

**If yes, please mark your level of agreement with the below statements.**

1. **a) The Victorian Allied Health Assistant Workforce Project resources required adapting for my work setting.**

1 (not at all), 10 (significant adaptation)

**N/A 1 2**  **3 4**  **5**  **6 7 8 9 10**
**_______________________________________________________________________________________**

1. **The Victorian Allied Health Assistant Workforce Project resources have changed the way my workplace works with Allied health assistants.**

1 (not at all), 10 (significant change)

**N/A 1 2**  **3 4**  **5**  **6 7 8 9 10**
**_______________________________________________________________________________________**

1. **The Victorian Allied Health Assistant Workforce Project resources will continue to be used in my work setting.**

1 (not at all), 10 (will absolutely continue)

**N/A 1 2**  **3 4**  **5**  **6 7 8 9 10**
**_______________________________________________________________________________________**

1. **What is your confidence level with implementing the Victorian Allied Health Assistant Workforce Project recommendations and resources into practice at your workplace?**

1 (not at all confident), 10 (very confident)

**N/A 1 2**  **3 4**  **5**  **6 7 8 9 10**
**______________________________________________________________________________________**

*N.B subject to change according to EOI outcomes. Quantitative response data to be further explored with preliminary interviews to ascertain qualitative data.

## Supplementary File 2

**Pre-Implementation Scoping Questions:**

Instructions

This series of scoping questions has been designed to support the Victorian Allied Health Assistant Workforce Project coaching team to better understand your workplace. The questions relate to the Victorian Allied Health Assistant Workforce Recommendations and will support evaluation of the implementation coaching program.

Some of the questions, regarding Allied health assistant (AHA) workforces, you have already answered partially or fully in your expression of interest. In this scenario we have pre-filled the information for you. Please read and amend these sections to ensure it reflects current practice and activity within your workplace.

If you have any questions about the scoping questions or how to complete any of the sections please reach out to the project team at [VictorianAHAWorkforcePlan@monashhealth.org](mailto:VictorianAHAWorkforcePlan@monashhealth.org).

We look forward to meeting with you in February 2023.

**The Victorian Allied Health Assistant Workforce Project team**

| What is the current headcount and total EFT of the AHA workforce in your workplace |
| --- |
| *Insert text* |
| What is the grading structure of the AHA workforce? |
| *Insert text* |
| Describe the qualification profile of your AHA workforce (Cert III, Cert IV)? |
|  |
| Describe (list) the clinical areas where AHA workforces are utilized. |
|  |
| What is the operational management structure for the AHA workforce? |
|  |
| What professional governance structure is currently in place for AHA workforces? |
|  |
| How would you define the productivity of the AHA workforce at your workplace?  (ie, do you have access to productivity data? What is the current clinical to non-clinical ratio ie, 70:30, 80:20, 100:0?) |
|  |
| What are the clinical supervision requirements and process for AHA workforces in your workplace? (ie, mode of supervision, frequency, documentation requirements) |
|  |
| How do these differ (or not) from AHP supervision processes? |
|  |
| Who provides clinical supervision to AHAs in your workplace? |
|  |
| What non-clinical development opportunities are available for AHAs in your workplace? (ie, non-clinical roles, portfolios, committees, leadership positions, quality projects, research activities, service planning, interviewing) |
|  |
| What are the drivers that influence AHA workforce growth in your workplace? How are new roles advocated for? |
|  |
| What barriers currently exist in your workplace to growing the AHA workforce? |
|  |
| How is the AHA role and scope of practice clearly defined within your workplace? |
|  |
| How are AHA and AHP workforces supported to have clear knowledge around the differences between an AHA and AHP’s scope of practice? |
|  |
| What delegation training in in place in your workplace? How is this reviewed? |
|  |

**Future Goals/Planning for workforce planning and governance:**

**This has been identified as a key area of improvement for your workplace, with your key goals previously identified as:**

**Do you have any additional comments or information to add with regards to these goals?**

*Insert text*

| How are consumers engaged in Allied health service planning in your workplace currently? |
| --- |
|  |
| Is this level of engagement similar in AHA service planning? |
|  |
| Would consumers receiving services at your workplace be aware of the differences between an AHA and AHP? And if so, how do you know this? |
|  |

**Future Goals/Planning for consumer centerd therapy and supports:**

*Additional comments*

| Describe AHA workforce qualification requirements (including any equivalents) for AHAs recruited to your workplace. |
| --- |
|  |
| Is a standard AHA position description used across the department/program/workplace? |
|  |
| Are behavioural questions a standard aspect of AHA workforce interviews? |
|  |

**Future Goals/Planning for recruitment:**

*Additional comments*

| Describe the onboarding and orientation process for AHA’s in the workplace? Who is involved? |
| --- |
|  |
| You have indicated that your workplace does, or plans to, provide access to an allied health early graduate program. Please describe what this early graduate program for allied health professionals looks like. How will AHA workforces access this program? |
|  |

**Future Goals/Planning for orientation and induction:**

**This has been identified as a key area of improvement for your workplace, with your key goals previously identified as**

**Do you have any additional comments or information to add with regards to these goals?**

*Insert text*

| What is the current process for competency-based training Allied health in your workplace? How does this apply to AHA workforces? |
| --- |
|  |
| How are your AHA competencies defined? |
|  |
| How are competency-based training packages delivered? |
|  |
| Who completes AHA competency assessments? How is the appropriateness of this assessor determined? |
|  |
| How is competency attainment recorded? |
|  |
| What is the process to determine new and review existing competencies for AHA workforces? |
|  |
| How does the workplace or a supervising AHP know an AHA is working within an approved scope of practice? |
|  |

**Future Goals/Planning for competency-based training and assessment:**

**This has been identified as a key area of improvement for your workplace, with your key goals previously identified as….**

**Do you have any additional comments or information to add with regards to these goals?**

*Insert text*

| What is the process by which individual AHA learning needs are determined in your workplace? |
| --- |
|  |
| How are AHAs supported to attend internal or external professional development opportunities? How does this differ from AHPs? |
|  |
| Is AHA professional development recorded? What documentation is in place to support this? |
|  |

**Future Goals/Planning for professional development:**

**This has been identified as a key area of improvement for your workplace, with your key goals previously identified as….**

**Do you have any additional comments or information to add with regards to these goals?**

*Insert text*

| Do you have an existing partnership with an RTO? |
| --- |
|  |
| What is the total number of students you offer AHA placements to across the year? |
|  |
| How many AHAs are involved in the supervision of students? |
|  |
| Do you feel your AHA placement capacity is appropriate, or could it be increased or need to be reduced? |
|  |
| What grade are the AHAs who undertake student supervision? |
|  |
| What level of VET training do the AHA’s who undertake student supervision have? |
|  |
| Do you offer any internal PD for AHA’s undertaking student supervision? Please briefly describe any internal PD required/available. |
|  |
| Do any of your AHAs or AHPs deliver education at local RTOs? |
|  |

**Future Goals/Planning for pre-employment training:**

*Additional comments*

**Supplementary File 3**

**Post-implementation interview guide**

**Enablers**

1. What was your experience of the program? Consider the value and impact of the program.
   1. Site visits
   2. Frequency of weekly coaching
   3. Workshop components
   4. Setting SMART goals
   5. Online AHA catch ups
2. Did the implementation coaching program meet your intended purpose?
3. There may be aspects that facilitated change and some that did not. Can you tell us what helped make any change in your organization?

**Barriers**

1. Sometimes people experience barriers when implementing change – what was your experience? Did you implement any barriers?

**Change in practice**

1. We were wondering how participating in the coaching has changed things in your workplace, if at all?

**Sustainability**

1. How will you sustain any changes to practice made in your workplace?

**Extendibility**

1. Can you see coaching being used in any other areas of the workforce?
2. What else would help in your setting to increase utilization/uptake of AHAs?

**Wrap up**

1. I’m going to go back through with you on the key points of this interview. You can correct me or add anything else you wish.

**Supplementary File 4**

**Organizational Readiness for Implementing Change (ORIC) results**

|  | W/PLACE 1 | W/PLACE 2 | W/PLACE 3 | W/PLACE 4 | W/PLACE 5 | W/PLACE 6 |
| --- | --- | --- | --- | --- | --- | --- |
| PEOPLE WHO WORK HERE FEEL CONFIDENT THAT THE ORGANIZATION CAN GET PEOPLE INVESTING IN IMPLEMENTING THIS CHANGE | 5 | 4 | 2 | 4 | 5 | 5 |
| PEOPLE WHO WORK HERE ARE COMMITTED TO IMPLEMENTING THIS CHANGE | 5 | 4 | 2 | 4 | 5 | 3 |
| PEOPLE WHO WORK HERE FEEL CONFIDENT THAT THEY CAN KEEP TRACK OF PROGRESS IN IMPLEMENTING THIS CHANGE | 5 | 3 | 3 | 4 | 5 | 3 |
| PEOPLE WHO WORK HERE WILL DO WHATEVER IT TAKES TO IMPLEMENT THIS CHANGE | 5 | 4 | 3 | 4 | 4 | 3 |
| PEOPLE WHO WORK HERE FEEL CONFIDENT THAT THE ORGANIZATION CAN SUPPORT PEOPLE AS THEY ADJUST TO THIS CHANGE | 5 | 4 | 3 | 4 | 4 | 3 |
| PEOPLE WHO WORK HERE WANT TO IMPLEMENT THIS CHANGE | 5 | 5 | 4 | 5 | 5 | 5 |
| PEOPLE WHO WORK HERE FEEL CONFIDENT THAT THEY CAN KEEP THE MOMENTUM GOING IN IMPLEMENTING THIS CHANGE | 5 | 4 | 3 | 4 | 4 | 3 |
| PEOPLE WHO WORK HERE FEEL CONFIDENT THAT THEY CAN HANDLE THE CHALLENGES THAT MIGHT ARISE IN IMPLEMENTING THIS CHANGE | 5 | 4 | 3 | 4 | 4 | 3 |
| PEOPLE WHO WORK HERE ARE DETERMINED TO IMPLEMENT THIS CHANGE | 5 | 5 | 4 | 5 | 5 | 5 |
| PEOPLE WHO WORK HERE FEEL CONFIDENT THAT THEY CAN COORDINATE TASKS SO THAT IMPLEMENTATION GOES SMOOTHLY | 4 | 4 | 3 | 4 | 4 | 3 |
| PEOPLE WHO WORK HERE ARE MOTIVATED TO IMPLEMENT THIS CHANGE | 5 | 5 | 4 | 4 | 5 | 5 |
| PEOPLE WHO WORK HERE FEEL CONFIDENT THAT THEY CAN MANAGE THE POLITICS OF IMPLEMENTING THIS CHANGE | 3 | 4 | 4 | 2 | 3 | 3 |
| TOTALS | 57 | 50 | 38 | 48 | 53 | 44 |
| Change Commitment DOMAIN Score/ CHANGE Efficacy DOMAIN score | 35/22 | 30/20 | 22/16 | 30/18 | 33/20 | 29/15 |
| Mean (Range) of TOTAL ORIC SCORE | 48 (38,57) | | | | | |

**Supplementary File 5**

**Workforce survey statistical analysis**

| VARIABLE N | CATEGORY | PRE (287) | POST (261) | P-VALUE |
| --- | --- | --- | --- | --- |
| I HAVE THE SKILLS TO OPTIMALLY WORK WITH AHAS IN MY WORKPLACE | Other  agree/strongly agree | 64 (22.3%)  223 (77.7%) | 42 (16.1%)  219 (83.9%) | 0.066 |
| Other  strongly disagree/ disagree | 269 (93.7%)  18 (6.3%) | 248 (95.0%)  13 (5.0%) | 0.51 |
| HAVING ALLIED HEALTH PROFESSIONALS AND ALLIED HEALTH ASSISTANTS WORK WELL TOGETHER, WILL BENEFIT MY WORKPLACE | Other agree/strongly agree | 31 (10.8%)  256 (89.2%) | 37 (14.2%)  224 (85.8%) | 0.23 |
| Other  strongly disagree/ disagree | 281 (97.9%)  6 (2.1%) | 257 (98.5%)    4 (1.5%) | 0.63 |
| THE ALLIED HEALTH ASSISTANT ROLE IS WELL RESPECTED IN MY WORKPLACE | Other agree/strongly agree | 67 (23.3%)  220 (76.7%) | 56 (21.5%)  205 (78.5%) | 0.60 |
| Other  strongly disagree/ disagree | 266 (92.7%)  21 (7.3%) | 245 (93.9%)  16 (6.1%) | 0.58 |
| THE ALLIED HEALTH ASSISTANT ROLE AND SCOPE OF PRACTICE IS WELL UNDERSTOOD IN MY WORKPLACE | Other agree/strongly agree | 156 (54.4%)  131 (45.6%) | 144 (55.2%)  117 (44.8%) | 0.85 |
| Other  strongly disagree/ disagree | 210 (73.2%)  77 (26.8%) | 193 (73.9%)  68 (26.1%) | 0.84 |
| THE ALLIED HEALTH ASSISTANT ROLE IS VALUED IN MY WORKPLACE - | Other agree/strongly agree | 62 (21.6%)  225 (78.4%) | 55 (21.1%)  206 (78.9%) | 0.88 |
| Other  strongly disagree/ disagree | 265 (92.3%)  22 (7.7%) | 248 (95.0%)  13 (5.0%) | 0.20 |

Combined **AHA** survey results for all 6 organizations Pre /Post Coaching:

| VARIABLE N | CATEGORY | PRE 77 | POST 62 | P VALUE |
| --- | --- | --- | --- | --- |
| I HAVE THE SKILLS TO OPTIMALLY WORK WITH AHPS IN MY WORKPLACE | Other  Agree/strongly agree | 8 (10%)  69 (90%) | 3 (5%)  59(95%) | 0.23 |
| Other  strongly disagree/disagree | 75 (97%)  2 (3%) | 59 (95%)  3(5%0 | 0.48 |
| HAVING ALLIED  HEALTH PROFESSIONALS AND ALLIED HEALTH ASSISTANTS WORK WELL TOGETHER, WILL BENEFIT MY WORKPLACE | Other  Agree/strongly agree | 9 (12%)  68(88%) | 7(11%)  55(89%) | 0.94 |
| Other  strongly disagree/disagree | 75 (97%)  2 (3%) | 59 (95%)  3 (5%) | 0.48 |
| THE ALLIED HEALTH ASSISTANT ROLE IS WELL RESPECTED IN MY WORKPLACE | Other  Agree/strongly agree | 33 (43%)  44 (57%) | 16 (26%)  46 (74%) | 0.036 |
| Other  strongly disagree/disagree | 63 (82%)  14 (18%) | 58 (94%)  4 (6%) | 0.041 |
| THE ALLIED HEALTH ASSISTANT ROLE AND SCOPE OF PRACTICE IS WELL UNDERSTOOD IN MY WORKPLACE | Other  Agree/strongly agree | 40 (52%)  37 (48%) | 27 (44%)  35 (56%) | 0.32 |
| Other  strongly disagree/disagree | 56 (73%)  21 (27%) | 47 (76%)  15 (24%) | 0.68 |
| THE ALLIED HEALTH ASSISTANT ROLE IS VALUED IN MY WORKPLACE | Other  Agree/strongly agree | 26 (34%)  51 (66%) | 16 (26%)  46 (74%) | 0.31 |
| Other  strongly disagree/disagree | 64 (83%)  13 (17% | 57 (92%)  5 (8%) | 0.12 |

Combined **AHP** survey results for all 6 Organizations Pre/Post coaching:

| VARIABLE N | CATEGORY | PRE 210 | POST 199 | P VALUE |
| --- | --- | --- | --- | --- |
| I HAVE THE SKILLS TO OPTIMALLY WORK WITH AHAS IN MY WORKPLACE | Other  Agree/strongly agree | 56(26.7%)  154 (73.3%) | 39 (19.6%)  160 (80.4%) | 0.091 |
| Other  strongly disagree/disagree | 194 (92.4%)  16 (7.6%) | 189 (95.0%)  10 (5.0%) | 0.28 |
| HAVING ALLIED  HEALTH PROFESSIONALS AND ALLIED HEALTH ASSISTANTS WORK WELL TOGETHER, WILL BENEFIT MY WORKPLACE | Other  Agree/strongly agree | 22 (10.5%)  188 (89.5%) | 30 (15.1%)  169 (84.9%) | 0.16 |
| Other  strongly disagree/disagree | 206 (98.1%)  4 (1.9%) | 198 (99.5%)  1 (0.5%) | 0.20 |
| THE ALLIED HEALTH ASSISTANT ROLE IS WELL RESPECTED IN MY WORKPLACE | Other  Agree/strongly agree | 34 (16.2%)  176 (83.8%) | 40 (20.1%)  159 (79.9%) | 0.30 |
| Other  strongly disagree/disagree | 203 (96.7%)  7 (3.3%) | 187 (94.0%)  12 (6.0%) | 0.20 |
| THE ALLIED HEALTH ASSISTANT ROLE AND SCOPE OF PRACTICE IS WELL UNDERSTOOD IN MY WORKPLACE | Other  Agree/strongly agree | 116 (55.2%)  94 (44.8%) | 117 (58.8%)  82 (41.2%) | 0.47 |
| Other  strongly disagree/disagree | 154 (73.3%)  56 (26.7%) | 146 (73.4%)  53 (26.6%) | 0.99 |
| THE ALLIED HEALTH ASSISTANT ROLE IS VALUED IN MY WORKPLACE | Other  Agree/strongly agree | 36 (17.1%)  174 (82.9%) | 39 (19.6%)  160 (80.4%) | 0.52 |
| Other  strongly disagree/disagree | 201 (95.7%)  9 (4.3%) | 191 (96.0%)  8 (4.0%) | 0.89 |
